## 25 **Abstract**

26 **Purpose:** Sedentary behavior has become a public health pandemic and has been associated  
27 with a variety of comorbidities including cardiovascular disease, type 2 diabetes, and some  
28 cancers. Previous studies have also shown that excessive amount of sedentary behavior is  
29 associated with all-cause mortality. However, no studies investigated whether patterns of  
30 sedentary and active time accumulation are associated with mortality independently of total  
31 sedentary and total active times. This study addresses this question by i) comparing several  
32 analytical ways to quantify patterns of both sedentary and active time accumulation through  
33 metrics of fragmentation of objectively-measured physical activity and ii) exploring the  
34 association of these metrics with all-cause mortality in a nationally representative US sample of  
35 elderly adults.

36 **Methods:** The accelerometry data of 3400 participants aged 50 to 84 in the National Health and  
37 Nutrition Examination Survey 2003-2006 cohorts were analyzed. Ten fragmentation metrics  
38 were calculated to quantify the duration of sedentary and active bouts: average bout duration,  
39 Gini index, average hazard, between-state transition probability, and the parameter of power law  
40 distribution. The association of these fragmentation metrics with all-cause mortality followed  
41 through December 31, 2011 was assessed with survey-weighted Cox proportional hazard  
42 models.

43 **Results:** In models adjusted for age, sex, race/ethnicity, education, body mass index, common  
44 comorbidities, and total sedentary/active time, four fragmentation metrics were associated with  
45 lower mortality risk: average active bout duration (HR=0.72 for 1SD increase, 95% CI = 0.59-  
46 0.88), Gini index for active bouts (HR = 0.75, 95% CI = 0.64-0.86), the parameter of power law  
47 distribution for sedentary bouts (HR = 0.75, 95% CI = 0.63-0.90), and sedentary-to-active

48 transition probability (HR = 0.77, 95% CI = 0.61-0.96), and four fragmentation metrics were  
49 associated with higher mortality risk: the active-to-sedentary transition probability (HR = 1.40,  
50 95% CI=1.23-1.58), the parameter of power law distribution for active bouts (HR = 1.33, 95%  
51 CI = 1.16-1.52), average hazard for durations of active bouts (HR = 1.32, 95% CI = 1.18-1.48),  
52 and average sedentary bout duration (HR =1.07, 95% CI = 1.01-1.13). After sensitivity analysis,  
53 average sedentary bout duration and sedentary-to-active transition probability became  
54 insignificant.

55 **Conclusion:** Longer average duration of active bouts, a lower probability of transitioning from  
56 active to sedentary behavior, and a higher normalized variability of active bout durations were  
57 strongly negatively associated with all-cause mortality independently of total active time. A  
58 larger proportion of longer sedentary bouts were positively associated with all-cause mortality  
59 independently of total sedentary time. The results also suggested a nonlinear association of  
60 average active bout duration with mortality that corresponded to the largest risk increase in  
61 subjects with average active bout duration less than 3 minutes.

62 **Key Words:** objectively-measured physical activity, accelerometry, sedentary behavior,  
63 fragmentation, mortality, NHANES.

64

65

66

67

68

69

## 70 **Introduction**

71            Sedentary behavior is a significant risk factor for a wide range of chronic diseases,  
72 comorbidities, and mortality [1–10]. As people age, sedentary behaviors increase [7,11,12].  
73 However, little is known about the detailed changes in daily sedentary patterns that accompany  
74 these shifts. A better understanding of temporal patterns of sedentary behavior in the  
75 characteristics of daily activities may clarify the role sedentary behaviors play in the progression  
76 of disability and disease, and thus provide more relevant public health recommendations  
77 regarding aging and diseases. Recently, the proliferation of wearable accelerometers has  
78 provided researchers with high-resolution, continuous activity data. As a result, accelerometer-  
79 measured physical activity (PA) offers the potential for both exploring detailed patterns of  
80 sedentary behaviors and providing more accurate estimates of overall sedentary behaviors, which  
81 have traditionally been underestimated by subjective methods [13,14].

82            Frequently, studies quantify sedentary behavior via an absolute amount (total sedentary  
83 minutes per day) or proportion (percentage) of waking hours spent sedentary [7,11,15,16].  
84 Isotemporal substitution (ITS) model has been recently proposed to examine effects of replacing  
85 sedentary behavior with light PA (LiPA) and moderate-to-vigorous PA (MVPA) on weight,  
86 cardiovascular disease biomarkers, and mortality [2,17–19]. Compositional data analysis  
87 (CoDA) has been applied recently [20–22] to study the combined effects of time spent in LiPA  
88 and MVPA, sedentary behaviors and sleep while taking into account the codependence between  
89 those behaviors due to the finite time during a day. CoDA considers the time budget composition  
90 of the day without encountering issues of spurious correlations and collinearity. Both ITS and  
91 CoDA study the effect of allocation of the 24-hour budget between time spent in sedentary  
92 behavior, LiPA, MVPA and sleep and do not take into account how those total times have been

93 accumulated. Several methods have been recently proposed to quantify the patterns of sedentary  
94 time accumulation to better understand how these patterns affect health and functional status.  
95 Conceptually, these methods segment objectively-measured daily activity into alternating bouts  
96 of sedentary and active time and the patterns are quantified via summaries of duration of  
97 frequency of switching between sedentary and active bouts.

98         From a statistical perspective, these methods can be grouped into two categories:  
99 nonparametric and parametric. Nonparametric approaches do not impose any distributional  
100 assumptions and summarize the distribution of bout durations via average duration, variability of  
101 durations, or describe properties of durations via hazard function. Paraschiv-Ionescu [23] used  
102 the area above the cumulative distribution function curve (AAC) of bout durations to study the  
103 relationship between chronic pain and PA. Mathematically, AAC is equivalent to the average  
104 bout duration. Healy et al. [5,24–26] and Chastin et al. [27] both proposed to use the reciprocal  
105 of average sitting or sedentary bout duration, which is shown in this paper to be related to the  
106 sedentary-to-active transition probability. The Gini index, a normalized measure of the  
107 variability of durations of sedentary bouts, has been proposed and applied by Chastin [13]. Lim  
108 [28] proposed to use two non-parametric summaries,  $k_{ar}$  and  $k_{ra}$ , to quantify the frequency of  
109 switching from active to resting (sedentary) and from resting (sedentary) to active state and  
110 defined them as the constant level of corresponding hazard functions.

111         Parametric approaches assume that bout durations follow a specific probability  
112 distribution, and then estimate the parameters that characterize the chosen distribution  
113 [13,23,27,29]. The most popular distribution used to quantify patterns of sedentary time  
114 accumulation is the power law distribution [13,23]. The parameter of power law has  
115 demonstrated stronger associations with clinical outcomes the total sedentary time in many

116 clinical populations [13,23,27]. Another choice is the exponential distribution, a commonly used  
117 parametric distribution for time-to-event data [30]. Nakamura [29] modeled the duration of  
118 active periods using the stretched exponential distribution. Paraschiv-Ionescu [23] compared the  
119 performance of several heavy tail distributions to model sedentary and active duration, including  
120 the lognormal and the double Pareto distribution (Pareto2).

121 This work studies patterns of sedentary and active time accumulation with the  
122 fragmentation metrics outlined above using accelerometry data from 50 year and older  
123 participants of 2003-2006 National Health and Nutrition Examination Survey (NHANES). It  
124 compares the fragmentation metrics from both a practical and a statistical perspective and  
125 investigates whether these metrics are associated with mortality independently of total sedentary  
126 and total active time.

127

## 128 **Methods**

### 129 **Study Populations and Measures**

130 The National Health and Nutrition Examination Survey (NHANES) is a stratified,  
131 multistage, probabilistic sample representative of the civilian non-institutionalized U.S.  
132 population, described in detail elsewhere [31]. Fragmentation metrics were calculated from  
133 NHANES 2003-2004 and 2005-2006 waves, in which NHANES recruited a representative sub-  
134 sample aged 6 years and older to objectively evaluate PA using accelerometry. Since a survival  
135 analysis was conducted, subjects under the age of 50 years were excluded from the analysis to  
136 minimize potential biases induced by including younger individuals who were susceptible to  
137 genetic and/or atypical virulent diseases not related to habitual physical activity. NHANES data  
138 have been linked to death records from the National Death Index through December 31, 2011. If

139 a participant is deceased, the duration of time in months between the NHANES examination and  
140 death is provided. Accidental deaths were excluded from the analysis. Demographic and  
141 comorbidity information that are available included, age, gender, race, education level, smoking  
142 status (never, former, current), drinking status (former or current drinker, heavy drinker,  
143 moderate drinker, non-drinker), body mass index (BMI; kg/m<sup>2</sup>), mobility difficulty (yes, no),  
144 diagnosis of diabetes, coronary heart disease, congestive heart failure, stroke, and cancer.  
145 Subjects with missing covariates were also excluded. In total, 3400 participants aged 50 to 84  
146 years who fulfilled the inclusion criteria remained in the analysis, where 1773 were from cohorts  
147 2003-2004, and 1627 were from cohorts 2005-2006. There were 542 reported deaths in the  
148 sample over an average of 6.4 follow-up years (7.2 for cohort 2003-2004, and 5.6 for cohort  
149 2005-2006).

150 Physical activity was measured with the ActiGraph AM-7164 accelerometer (ActiGraph,  
151 LLC, Fort Walton Beach, Florida). The device was placed on an elasticized fabric belt, custom-  
152 fitted for each subject, and worn on the right hip. Participants were instructed to remove the belt  
153 while sleeping, bathing, and swimming. The monitors were programmed to record activity  
154 counts in successive 1-minute epochs for up to 7 consecutive days. Non-wear time was defined  
155 as any interval of 90 minutes or longer in which all count values were 0 with allowance for up to  
156 two minutes of non-zero counts between 1 and 99 [32,33]. Subjects were included if they had at  
157 least one valid day of accelerometer data, defined as at least 10 hours of wear time and all  
158 NHANES generated quality flags for the data were deemed valid [34].

159 Following previous work [35,36], minutes with activity counts < 100 are defined as  
160 sedentary, and minutes with activity counts ≥100 are defined as active without further  
161 distinguishing between light physical activity (LIPA) and moderate to vigorous physical activity

162 (MVPA). A sedentary or active bout is defined as being sedentary or active for at least one  
163 minute.

## 164 **Notations**

165 First, necessary notations are introduced. To define fragmentation metrics, the following  
166 notations are introduced: the duration of the longest active bout is denoted by  $D_A$ , the number of  
167 bouts of length  $t$  is denoted by  $n_A(t)$ , the number of active bouts of length  $\leq t$  is denoted by  $n_A^c(t)$ .  
168 Total active time can be represented as  $T_A = \sum_{t=1}^{D_A} n_A(t) \cdot t$ , and the total number of active bouts  
169 can be represented as  $n_A = \sum_{t=1}^{D_A} n_A(t)$ . Notations for sedentary bouts can be defined similarly,  
170 with all subscripts changed to “S”. When introducing and defining the fragmentation metrics, the  
171 subscripts are sometimes dropped since they are defined for both sedentary and active. For  
172 simplicity of exposition, most of the conceptual derivations below will assume continuous  $t$ .  
173 Necessary adjustments are required to account for the fact that observed durations are integers.  
174 In this context, the continuity assumption is reasonable as a minute-level epoch assumption may  
175 be relaxed and a much finer resolution can be considered for high-frequency accelerometry data.

## 176 **Nonparametric metrics**

177 We now review nonparametric fragmentation metrics.

### 178 **1. Average duration**

179 The simplest and the most intuitive fragmentation metric is the average bout duration.  
180 Some previous studies have demonstrated usage of average bout durations. Paraschiv-Ionescu  
181 used the area above the cumulative distribution function curve (AAC) of bout durations (which  
182 statistically is equivalent to average duration) to study the relationship between chronic pain and  
183 PA [23]. To study how “breaks” of sedentary was associated with metabolic risk, Healy et al.



184 considered the mean duration of the breaks [25]. Similarly, Lynch et al calculated the average  
185 length of active and sedentary bouts and studied their association with breast cancer biomarkers  
186 [37]. Average bout duration is denoted by  $\mu$  and estimated as

$$187 \quad \mu = \frac{T}{n} = \frac{\sum_{t=1}^D n(t) \cdot t}{\sum_{t=1}^D n(t)} \quad (\text{Equation 1})$$

188 respectively.

## 189 **2. Normalized variability**

190 Second most common method for nonparametrically summarizing a distribution is to  
191 estimate its variability. The Gini index was originally developed in econometrics to study the  
192 statistical dispersion of the distribution of incomes [38] and was used by Chastin et al [13] as a  
193 measure of the accumulation of sedentary time. Here, the Gini index is denoted by  $g$ , and defined  
194 and estimated as

$$195 \quad g = \frac{\sum_{t_1=1}^D \sum_{t_2=1}^D n(t_1)n(t_2)|t_1-t_2|}{2n^2\mu} \quad (\text{Equation 2})$$

196 respectively.

197 The Gini index can be seen as a measure of (absolute, not squared) variability of bout  
198 durations normalized by the average duration. It can be shown that  $g$  is bounded between 0 and 1  
199 [38]. When Gini index is close to 1, it indicates that total time is accumulated via a small number  
200 of longer bouts. Conversely, when Gini index is close to 0, it indicates that all bouts contribute  
201 equally to total time.

## 202 **3. Average hazard**

203 Lim et al. [28] proposed two metrics  $k_{ra}$  and  $k_{ar}$  to quantify the frequency of switching  
204 from active to resting (sedentary) and from resting (sedentary) to active states, respectively, and

205 studied their association with cognitive impairment in older adults [39]. Similarly, they adopted  
206 this concept to study sleep fragmentation and its effects on Alzheimer's Disease (AD) [40,41].  
207 The estimation procedure focused on estimation of "transition probability" as a function of bout  
208 duration, applied smoothing, and identified a range of durations when the "transition probability"  
209 function flattened out. The constant values of the "transition probability" from those "constancy"  
210 ranges have defined  $k_{ra}$  and  $k_{ar}$ .

211 From a statistical point of view, the "transition probability" function constructed by Lim  
212 et.al is exactly the hazard function widely used and studied in survival analysis. Modeling the  
213 hazard function is a principal approach for analyzing time-to-event data. The hazard function can  
214 be seen as the instantaneous probability of failure at time  $t$  given that the subject has survived  
215 until time  $t$  [30,42,43]. In this sense, the hazard is a measure of risk: the greater the hazard, the  
216 greater the risk of failure. Thus, in terms of dichotomous sedentary-active states, the hazard  
217 function can be used to study the probability of transitioning from sedentary to active or from  
218 active to sedentary state.

219 There are a few statistical reservations and modeling limitations to directly use the  
220 proposal of Lim et al. [28]. First and the most important, their proposal does not provide a well-  
221 defined estimand of interest. Second, the estimation of  $k_{ra}$  and  $k_{ar}$  tries to identify the "constancy  
222 range" of hazard function - a restrictive and hard-to-verify assumption. Third, the proposal  
223 employs LOWESS smoothing to identify the "constancy" range, thus, requires "ad hoc"  
224 decisions to make. To avoid these limitations, but stay close to the original proposal, we suggest  
225 the average hazard (AH) as the primary estimand to non-parametrically summarize the hazard  
226 function as a function of bout duration. Next, we outline our proposed procedure to estimate the  
227 AH.

228 For observed durations  $t_1, \dots, t_n$ , it is assumed that there are  $m$  unique values, which are  
229 denoted in increasing order by  $\{t_{n_1}, t_{n_2}, \dots, t_{n_m}\}$ . Then, hazard rates can be estimated at these  
230 distinct bout durations nonparametrically using the Nelson-Aalen approach [43] while treating  
231 all bout durations as non-censored (i.e, all active bouts will transition to sedentary bouts, and  
232 vice versa)

$$233 \quad h(t_{n_i}) = \frac{n(t_{n_i})}{n - n^c(t_{n_{i-1}})} \text{ (Equation 3)}$$

234 where  $i = 1, \dots, m$ . Note that Nelson-Aalen approach does not estimate the hazard function at  
235 time points that are not observed. The AH is then estimated as

$$236 \quad \bar{h} = \frac{1}{m} \sum_{t \in D} h(t), \text{ (Equation 4)}$$

237 where  $D = \{t_{n_1}, t_{n_2}, \dots, t_{n_m}\}$ . Larger  $\bar{h}_S$  indicates a higher frequency of transitioning from  
238 sedentary to active state; and larger  $\bar{h}_A$  indicates a higher frequency of transitioning from active to  
239 sedentary state.

#### 240 **4. Transition probability**

241 Several studies have considered to use the reciprocal of average bout duration. To investigate  
242 the efficacy of a multicomponent intervention to reduce office workers' sitting time, Healy et al.  
243 considered "sit to stand transition" which is defined as "number of sit-to stand transitions per  
244 hour of sitting" [24]. Chastin [27] studied the accumulation of sedentary time in older adults with  
245 obesity and low muscle strength by using the ratio of the number of sedentary bouts divided by  
246 the total sedentary time.

247 Here the reciprocal of average bout duration is denoted by  $\lambda$ . It can be shown (see proof in S1  
248 Text) that  $\lambda$  is equal to between-states (i.e. sedentary-to-active or active-to-sedentary) transition

249 probability, namely

$$\lambda_S = \frac{n_S}{T_S} = \Pr(y_{t+1} = 1 | y_t = 0) \text{ (Equation 5)}$$

$$\lambda_A = \frac{n_A}{T_A} = \Pr(y_{t+1} = 0 | y_t = 1), \text{ (Equation 6)}$$

250 where  $y_t$  is the indicator of activity type (sedentary or active) at time epoch  $t$ , and 0 and 1  
251 denote sedentary and active states, respectively. Larger/smaller values of  $\lambda$  correspond to  
252 more/less frequent switching between the states and as a result, may indicate more/less  
253 fragmented activity pattern. It is important to note that larger/smaller values of  $\lambda$  also  
254 correspond to shorter/longer average bout duration.

255 From a parametric point of view, if the bout durations follow an exponential distribution,  
256 frequently used to model time-to-event data [30],  $\lambda$  is exactly the parameter that fully defines  
257 the exponential distribution with the following cumulative distribution function (CDF):

$$258 \quad F(t) = 1 - e^{-\lambda t}, t \geq 0 \text{ (Equation 7).}$$

259 Note that any parametric assumptions should be validated through an appropriate goodness-of-fit  
260 tests.

## 261 **Parametric metrics**

262 In this section, Power law, one of the most popular and widely used distribution to model  
263 bout duration, is discussed.

264 The CDF of a Power law or Type I Pareto distribution is defined as

$$265 \quad F(t) = 1 - \left(\frac{t}{t_{\min}}\right)^{-\alpha+1}, t \geq t_{\min}, \text{ (Equation 8)}$$

266 where  $t_{\min}$  is the lowest bout duration, the scaling parameter  $\alpha$  summarizes information about  
 267 the pattern of accumulation of total sedentary or total active time. Larger values of  $\alpha$  indicates  
 268 that subject tends to accumulate sedentary (active) time with a larger proportion of shorter  
 269 sedentary (active) bouts.

270 The parameter  $\alpha$  is typically estimated through maximum likelihood [44,45]. For the  
 271 analysis of bout durations, the distribution is assumed to be discrete and the approximation to  
 272 MLE estimator is used as follows

$$273 \quad \hat{\alpha} = 1 + n \left[ \sum_{i=1}^n \ln \frac{t_i}{\hat{t}_{\min} - 0.5} \right]^{-1} \text{ (Equation 9)}$$

274 [44]. Here  $\hat{t}_{\min}$  is the lower bound and can be estimated by the minimum bout length. Most  
 275 studies [13,46] assess the goodness-of-fit of a power law through a visual assessment of the  
 276 histogram of bout durations on doubly logarithmic plot. While Paraschiv-Ionescu employed a  
 277 formal statistical goodness-of-fit test based on Anderson-Darling test [23].

278

279 Table 1 summarizes all five metrics described above along with their estimation method  
 280 and interpretation.

281

282 Table 1: Summary of five-fragmentation metrics and their estimations

| Metrics              | Interpretation         | Estimation                                                              |
|----------------------|------------------------|-------------------------------------------------------------------------|
| <b>Nonparametric</b> |                        |                                                                         |
| $\mu$                | Average duration       | $\frac{T}{n}$                                                           |
| $g$                  | Normalized variability | $\frac{\sum_{t_1=1}^D \sum_{t_2=1}^D n(t_1)n(t_2) t_1 - t_2 }{2n^2\mu}$ |
| $\bar{h}$            | Average hazard         | $\bar{h} = \frac{1}{m} \sum_{t \in D} h(t)$                             |

|                   |                        |                                                                               |
|-------------------|------------------------|-------------------------------------------------------------------------------|
| $\lambda$         | Transition probability | $\frac{n}{T}$                                                                 |
| <b>Parametric</b> |                        |                                                                               |
| $\alpha$          | Power law distribution | $1 + n \left[ \sum_{i=1}^n \ln \frac{t_i}{\hat{t}_{\min} - 0.5} \right]^{-1}$ |

283

## 284 **Statistical analysis**

285 Descriptive statistics were grouped by the survival status at the end of follow-up. For  
286 each subject, distributions of sedentary and active bouts were calculated by aggregating data  
287 from all bouts across valid days. Marginal densities for each metric was plotted by the survival  
288 status (deceased/alive). Survey-weighted Cox proportional hazard models [47–49] were fitted to  
289 model mortality. All models were adjusted for the covariates and comorbidities described in the  
290 Measures subsection. Two groups of models were fitted. Models in Group A studied the  
291 individual effect of each fragmentation metric on the relative risk of death by including one  
292 metric at a time. Models in Group B studied the individual effect of each metric on the relative  
293 risk of death independently of total sedentary/active times by including total sedentary time in  
294 the models with fragmentation metrics summarizing sedentary bouts and including total active  
295 time in the models with fragmentation metrics summarizing active bouts. For additional  
296 interpretability of the results, each fragmentation metric included in the models was standardized  
297 by subtracting population-level mean and dividing by population-level standard deviation,  
298 resulting in hazard ratios that correspond to one standard deviation change.

299

## 300 **Results**

### 301 **Baseline characteristics**

302 Descriptive statistics stratified by survival status at the end of follow-up period are  
 303 presented in Table 2. All descriptive statistics are survey weighted to be representative of the U.S  
 304 population. The average age of the participants was 64 years. Slightly more than half of  
 305 participants were female (54%). Participants recorded as deceased tended to have greater daily  
 306 sedentary time and lower daily active time. In addition, deceased participants tended to be older  
 307 and have higher prevalence of comorbidities, mobility problems, and tobacco use.

308 Table 2: Baseline characteristics for all 3400 subjects, and by the end of follow-up status

| Variables             | Status at end of follow up |               | Total         |
|-----------------------|----------------------------|---------------|---------------|
|                       | Alive                      | Deceased      |               |
| n                     | 2858                       | 542           | 3400          |
| Age (mean (sd))       | 62.82 (9.62)               | 72.35 (10.16) | 64.07 (10.21) |
| Male (%)              | 44.9                       | 53.3          | 46            |
| Education (%)         |                            |               |               |
| Less Than High School | 30.8                       | 48.7          | 33.1          |
| High School           | 40.3                       | 35.7          | 39.7          |
| More Than High School | 28.9                       | 15.3          | 27.2          |
| Missing Education     | 0                          | 0.3           | 0.1           |
| Race (%)              |                            |               |               |
| White                 | 79.7                       | 82.1          | 80            |
| Black                 | 9.5                        | 10.1          | 9.5           |
| Mexican               | 4                          | 3.6           | 4             |
| Other Hispanic        | 2.5                        | 1             | 2.3           |
| Other Race            | 4.3                        | 3.2           | 4.2           |
| Alcohol History (%)   |                            |               |               |
| Never Drinker         | 13.3                       | 14.1          | 13.4          |
| Former Drinker        | 22.1                       | 40.8          | 24.6          |
| Current Drinker       | 60                         | 38.7          | 57.2          |
| Missing Information   | 4.6                        | 6.4           | 4.8           |
| Alcohol Usage (%)     |                            |               |               |
| Moderate Drinker      | 53.2                       | 31.9          | 50.4          |
| Heavy Drinker         | 6.7                        | 6.7           | 6.7           |
| Missing Information   | 40                         | 61.3          | 42.8          |
| Smoking (%)           |                            |               |               |
| Never Smoker          | 47.9                       | 30.4          | 45.6          |
| Former Smoker         | 35.7                       | 48            | 37.3          |
| Current Smoker        | 16.4                       | 21.6          | 17.1          |

|                              |                 |                 |                 |
|------------------------------|-----------------|-----------------|-----------------|
| Mobility Difficulty(%)       | 15.4            | 29.6            | 17.2            |
| CHF (%)                      | 3.8             | 17.3            | 5.5             |
| CHD (%)                      | 6.7             | 16.2            | 8               |
| Cancer (%)                   | 15.4            | 28.5            | 17.1            |
| Stroke (%)                   | 4               | 13.6            | 5.2             |
| Diabetes (%)                 | 12.8            | 25.5            | 14.5            |
| $T_S$ : total sedentary time | 532.68 (137.29) | 623.81 (179.83) | 544.57 (146.79) |
| $T_A$ : total active time    | 341.08 (103.46) | 247.40 (108.16) | 328.85 (108.75) |
| $\mu_S$                      | 6.39 (2.71)     | 9.12 (7.42)     | 6.75 (3.79)     |
| $\mu_A$                      | 3.89 (1.24)     | 3.05 (1.02)     | 3.78 (1.25)     |
| $\lambda_S$                  | 0.18 (0.06)     | 0.14 (0.06)     | 0.17 (0.06)     |
| $\lambda_A$                  | 0.28 (0.08)     | 0.36 (0.11)     | 0.29 (0.09)     |
| $g_S$                        | 0.61 (0.05)     | 0.63 (0.05)     | 0.61 (0.05)     |
| $g_A$                        | 0.50 (0.06)     | 0.45 (0.08)     | 0.50 (0.07)     |
| $\bar{h}_S$                  | 0.17 (0.04)     | 0.15 (0.04)     | 0.17 (0.04)     |
| $\bar{h}_A$                  | 0.27 (0.08)     | 0.35 (0.11)     | 0.28 (0.09)     |
| $\alpha_S$                   | 1.57 (0.07)     | 1.52 (0.08)     | 1.56 (0.07)     |
| $\alpha_A$                   | 1.65 (0.07)     | 1.72 (0.10)     | 1.66 (0.08)     |

309

## 310 Differences by survival status

311 Density plots of all metrics and total sedentary and active times categorized by the  
312 survival status are shown in Fig 1. These plots along with Table 2 estimates marginal  
313 associations between the fragmentation metrics and mortality status. Participants in the deceased  
314 group (red) tended to have longer sedentary time ( $T_S$ ) and shorter active time ( $T_A$ ), longer  
315 average sedentary bout ( $\mu_S$ ) and shorter average active bout ( $\mu_A$ ) durations than participants in the  
316 alive group (blue). Deceased participants were also more likely to have larger  $g_S$  and smaller  $g_A$ ,  
317 indicating that their (normalized by the mean) sedentary bout durations are more variable while  
318 their (normalized by the mean) active bout durations are less variable. Considering the average  
319 hazard metrics, alive participants were more likely to transition from sedentary to active behavior  
320 (higher  $\bar{h}_S$ ), and deceased participants were more likely to transition from active to sedentary



321 behavior (higher  $\bar{h}_A$ ). Deceased participants also had smaller  $\lambda_S$  and higher  $\lambda_A$  that corresponded  
322 to smaller chances of switching from sedentary to active behavior and higher chances of  
323 switching from active to sedentary behavior. Similarly, deceased participants tended to  
324 accumulate total active time with shorter active bouts (larger  $\alpha_A$ ), and accumulate total sedentary  
325 time with longer sedentary bouts (smaller  $\alpha_S$ ). Another interesting observation is that while the  
326 distributions of  $\mu_S$  and  $\mu_A$  exhibit considerable skewness,  $\lambda_S$  and  $\lambda_A$  had near-symmetric  
327 population-level distributions, a highly desirable statistical property. Note also that because of  
328 the skewness in distributions, the population averages of  $\mu_S$  and  $\mu_A$  are quite different from the  
329 reciprocals of the population averages of,  $\lambda_S$  and  $\lambda_A$ .

330

331 **Fig 1. The estimated probability distribution functions of total sedentary time and**  
332 **sedentary fragmentation metrics (TOP) and total active time and active fragmentation**  
333 **metrics (BOTTOM) for deceased (red) and alive (blue) participants.**

334

### 335 **Pairwise scatterplots and correlations of fragmentation metrics**

336 Fig 2 shows the pairwise scatterplots (bottom triangle) and correlations (upper triangle)  
337 between all metrics. As expected, there was a clear parabolic association shape between  $\mu$  and  $\lambda$   
338 due to their definitions and estimation procedures. A parabolic relationship between  $\mu$  and  $\alpha$  was  
339 observed for both sedentary and active bouts. Meanwhile,  $\lambda$  and  $\bar{h}$  were highly positively  
340 correlated with a linear trend ( $\rho = 0.84$  for sedentary bouts, and  $\rho = 0.93$  for active bouts); and  $\lambda$   
341 and  $g$  were highly negatively correlated with a linear trend ( $\rho = -0.77$  for sedentary bouts, and  $\rho$   
342  $= -0.92$  for active bouts). Moreover,  $\lambda$  and  $\alpha$  had an almost linear relationship ( $\rho = 0.94$  for  
343 sedentary bouts, and  $\rho = 0.97$  for active bouts). The correlation between the total sedentary time

344 and the five sedentary bout fragmentation metrics were equal to 0.67, 0.57, -0.74, -0.74, -0.71.  
345 The correlations between the total active time and the five active bout fragmentation metrics  
346 were equal to 0.76, 0.74, -0.80, -0.81, -0.79. The shape and variability in the pair-wise  
347 scatterplots seem to indicate that fragmentation metrics may provide information about mortality  
348 beyond that of already provided by the total sedentary and total active times. In addition to  
349 revealing pairwise dependences between fragmentation metrics, Fig 2 allows to visually explore  
350 pairs of fragmentation metrics and their potential to separate deceased (red) from alive (blue)  
351 participants.

352

353 **Fig 2: Pairwise scatterplots (lower triangular) and correlations (upper triangular) for the**  
354 **fragmentation metrics for deceased (red) and alive (blue). Deceased group was plotted over**  
355 **the alive group.**

356

## 357 **Cox PH models**

358 Table in S1 Table shows the results of the baseline models adjusted for all covariates and  
359 comorbidities described in Measures and adjusted for the total sedentary time (Model 1) or the  
360 total active time (Model 2). The results were consistent with those reported in previous studies  
361 [35,50,51] and demonstrate that one minute increase of total active time is associated with lower  
362 mortality risk (HR = 0.99, 95% CI = 0.99-1.00), and one minute increase of total sedentary time  
363 is associated with higher mortality risk (HR = 1.002, 95% CI = 1.001-1.002).

364 The left panel of Table 3 shows the odds ratio based on 1 SD increase for models in  
365 Group A (unadjusted for total sedentary and total active time). All ten fragmentation metrics  
366 were significantly associated with the relative odds of mortality. Five fragmentation metrics had  
367 a negative significant association with the relative odds of mortality:  $\mu_A$ (HR = 0.50, 95% CI =

368 0.42-0.60),  $g_A$  (HR = 0.61, 95% CI = 0.55-0.69),  $\bar{h}_S$  (HR = 0.80, 95% CI = 0.70-0.92),  $\lambda_S$  (HR =  
 369 0.67, 95% CI = 0.57-0.79), and  $\alpha_S$  (HR = 0.69, 95% CI = 0.60-0.78). Conversely, the other five  
 370 fragmentation metrics had a positive association with the relative odds of mortality:  $\mu_S$  (HR  
 371 =1.11, 95% CI = 1.05-1.16),  $g_S$  (HR = 1.18, 95% CI = 1.04-1.34),  $\bar{h}_A$  (HR = 1.52, 95% CI = 1.39-  
 372 1.66),  $\lambda_A$  (per SD HR = 1.59, 95% CI=1.45-1.75), and  $\alpha_A$  (HR = 1.56, 95% CI = 1.42-1.72).

373 **Table 3: The results of fully adjusted Cox proportional hazard models (HR corresponding**  
 374 **to 1SD increase)**

| Metrics     | Group A            |          | Group B            |          |
|-------------|--------------------|----------|--------------------|----------|
|             | HR (95% CI)        | p values | HR (95% CI)        | p values |
| $\mu_S$     | 1.11* (1.05, 1.16) | 4.88e-05 | 1.07* (1.01, 1.13) | 2.82e-02 |
| $\mu_A$     | 0.50* (0.42, 0.60) | 4.26e-13 | 0.72* (0.59, 0.88) | 1.44e-03 |
| $g_S$       | 1.18* (1.04, 1.34) | 9.33e-03 | 1.00 (0.85, 1.18)  | 0.97     |
| $g_A$       | 0.61* (0.55, 0.69) | 6.66e-16 | 0.75* (0.64, 0.86) | 9.70e-05 |
| $\lambda_S$ | 0.67* (0.57, 0.79) | 8.56e-07 | 0.77* (0.61, 0.96) | 2.07e-02 |
| $\lambda_A$ | 1.59* (1.45, 1.75) | <2e-16   | 1.40* (1.23, 1.58) | 1.86e-07 |
| $\bar{h}_A$ | 1.52* (1.39, 1.66) | <2e-16   | 1.32* (1.18, 1.48) | 9.04e-07 |
| $\alpha_S$  | 0.69* (0.60, 0.78) | 4.05e-08 | 0.75* (0.63, 0.90) | 1.95e-03 |
| $\alpha_A$  | 1.56* (1.42, 1.72) | <2e-16   | 1.33* (1.16, 1.52) | 2.85e-05 |

375  
 376 \* Indicates significant association at 5% significance level.  
 377 HR: hazard ratio associated with one standard deviation increase  
 378 CI: confidence interval  
 379

380 The right panel of Table 3 shows the odds ratio based on 1 SD increase for models in  
 381 Group B. Models in Group B additionally included total sedentary time in the models with  
 382 sedentary bouts fragmentation metrics and included total active time in the models with active  
 383 bouts fragmentation metrics. After the adjustment for the total sedentary/active times, four  
 384 fragmentation metrics had a negative significant association with the relative odds of mortality:  
 385  $\mu_A$  (HR=0.72, 95% CI = 0.59-0.88),  $g_A$  (HR = 0.75, 95% CI = 0.64-0.86),  $\alpha_S$  (HR = 0.75, 95% CI  
 386 = 0.63-0.90),  $\lambda_S$  (per SD HR = 0.77, 95% CI = 0.62-0.96), and four fragmentation metrics had a

387 positive significant association with the relative odds of mortality:  $\mu_S$  (HR = 1.07, 95% CI = 1.01-  
 388 1.13),  $\bar{h}_A$  (HR = 1.32, 95% CI = 1.18-1.48),  $\alpha_A$  (HR = 1.33, 95% CI = 1.16-1.52), and  $\lambda_A$  (HR =  
 389 1.40, 95% CI=1.23-1.58).

## 390 Sensitivity Analysis

391 Two sensitivity analyses were conducted. The first explored possible effects of reversed  
 392 causality by excluding all deaths within the first year of follow-up. The second excluded days  
 393 with wear time longer than 20 hours to eliminate any bias from days when subjects wore  
 394 accelerometers during sleep.

395 The first sensitivity analysis excluded deaths within the first year of follow-up. After the  
 396 exclusion, 3334 (with 476 deaths) subjects remained and the same Cox PH models were re-  
 397 estimated. The results are shown in Table 4. The exclusion of the 1-st year follow-up deaths  
 398 slightly attenuated results, but has not changed neither the significance or direction of most of the  
 399 associations, with the exception of  $\lambda_S$  that became insignificant in the model of Group B.

400 **Table 4: The results of fully adjusted Cox proportional hazard models after excluding**  
 401 **deaths within the first year of follow-up (HR corresponding to 1SD increase)**

| Metrics     | Group A            |          | Group B            |          |
|-------------|--------------------|----------|--------------------|----------|
|             | HR (95% CI)        | p values | HR (95% CI)        | p values |
| $\mu_S$     | 1.11* (1.07, 1.16) | 7.18e-07 | 1.07* (1.02, 1.13) | 9.11e-03 |
| $\mu_A$     | 0.54* (0.45, 0.66) | 1.76e-09 | 0.71* (0.57, 0.87) | 1.30e-03 |
| $g_S$       | 1.15 (0.99, 1.34)  | 0.056    | 0.98 (0.82, 1.17)  | 0.83     |
| $g_A$       | 0.64* (0.57, .73)  | 4.77e-13 | 0.74* (0.64, 0.86) | 1.01e-04 |
| $\bar{h}_S$ | 0.83* (0.73, 0.95) | 8.67e-03 | 1.05 (0.90, 1.24)  | 0.52     |
| $\bar{h}_A$ | 1.45* (1.32, 1.59) | 1.48e-14 | 1.31* (1.16, 1.47) | 7.37e-06 |
| $\lambda_S$ | 0.73* (0.62, 0.85) | 4.92e-05 | 0.86 (0.69, 1.07)  | 0.18     |
| $\lambda_A$ | 1.51* (1.37, 1.67) | <2e-16   | 1.39* (1.20, 1.60) | 5.75e-06 |
| $\alpha_S$  | 0.73* (0.64, 0.84) | 3.60e-06 | 0.82* (0.68, 0.99) | 0.04     |
| $\alpha_A$  | 1.48* (1.34, 1.63) | 7.66e-15 | 1.31* (1.13, 1.52) | 2.97e-04 |

402

403 The second sensitivity analysis excluded days with wear time longer than 20 hours.  
 404 “Valid” days in the original analysis is defined based on the wearing time longer than 10 hour.  
 405 However, there are numbers of subject-days that had more than 20 hours of wear time, with up to  
 406 24 hours of wear per day. Including days with wear time longer than 20 hours might lead to  
 407 counting sleep time as sedentary that in turn could result in biased estimated summaries for  
 408 sedentary and active time. Therefore, for the second sensitivity analysis, valid day was defined as  
 409 a day with wear time between 10 and 20 hours. The threshold of 20 hours has been previously  
 410 used to identify “bed-time” periods in NHANES [52]. After exclusion of invalid subject-days  
 411 from the original samples, 3362 (with 534 deaths) subjects remained and same Cox PH models  
 412 where re-estimated. The results are shown in Table 5. Although, the direction of association and  
 413 significance for majority of the metrics remained the same, both  $\mu_S$  and  $\lambda_S$  became insignificant.

414 **Table 5: The results of fully adjusted Cox proportional hazard models after excluding**  
 415 **invalid days with either too short or too long wear time (HR corresponding to 1SD**  
 416 **increase)**

| Metrics     | Group A            |          | Group B            |          |
|-------------|--------------------|----------|--------------------|----------|
|             | HR (95% CI)        | p values | HR (95% CI)        | p values |
| $\mu_S$     | 1.11* (1.05, 1.16) | 1.05e-04 | 1.05 (0.99, 1.11)  | 0.13     |
| $\mu_A$     | 0.52* (0.43, 0.62) | 1.19e-11 | 0.78* (0.65, 0.95) | 1.24e-02 |
| $\lambda_S$ | 0.67* (0.58, 0.79) | 5.70e-07 | 0.79 (0.62, 1.02)  | 0.07     |
| $\lambda_A$ | 1.54* (1.40, 1.70) | <2e-16   | 1.30* (1.14, 1.48) | 6.24e-05 |
| $g_S$       | 1.21* (1.06, 1.38) | 3.82e-03 | 1.05 (0.90, 1.22)  | 0.53     |
| $g_A$       | 0.63* (0.56, 0.71) | 2.78e-14 | 0.78* (0.68, 0.90) | 5.23e-04 |
| $\bar{h}_S$ | 0.84* (0.74, 0.96) | 8.64e-03 | 1.03 (0.91, 1.16)  | 0.68     |
| $\bar{h}_A$ | 1.49* (1.36, 1.63) | <2e-16   | 1.27* (1.15, 1.41) | 2.03e-06 |
| $\alpha_S$  | 0.70* (0.61, 0.80) | 3.15e-07 | 0.79* (0.63, 1.00) | 4.99e-02 |
| $\alpha_A$  | 1.51* (1.37, 1.66) | <2e-16   | 1.23* (1.08, 1.42) | 2.62e-03 |

417  
 418 **Nonlinear effect of average active bout and average sedentary bout**  
 419 **durations**

420           Among all considered fragmentation metrics, average bout duration,  $\mu$ , is probably the  
421 most straightforward to calculate and communicate. Below, we show that, when modeled via  $\lambda$   
422 ( $=1/\mu$ ), the effect of  $\mu$  on proportional HR is highly nonlinear and the largest risk increase is  
423 observed in subjects with average active bout duration less than 3 minutes.

424           To illustrate our argument, we refer to Table in S2 Table that reports estimated effect for  
425 non-standardized fragmentation metrics with respective to 1 unit increase for  $\mu_A$  and  $\lambda_A$ , which  
426 equal to -0.26 and 3.88, respectively. The top panel in Fig 3 shows the hazard ratios with respect  
427 to a 1 minute increase of average activity bout calculated based on  $\mu_A$  (dashed line) and  $\lambda_A$  (solid  
428 line). When estimated from the Cox-PH model with  $\mu_A$ , the effect on the hazard ratio is constant  
429 and equal to  $e^{-0.27} = 0.77$  (dashed line in the top panel). This implies that increasing average  
430 active bout by 1 minute always reduces hazard by approximately 23%, regardless of “original”  
431 average bout duration. On contrary, when considering the effect of increasing  $\mu_A$  by 1 minute  
432 estimated in the Cox-PH model with  $\lambda_A$ , the nonlinear change is given by

$$433 \quad \exp\left(3.88\left(\frac{1}{\mu_A+1} - \frac{1}{\mu_A}\right)\right) = \exp\left(-\frac{3.88}{\mu_A(\mu_A+1)}\right). \text{ (Equation 10)}$$

434           The solid black line on top panel of Fig 3 demonstrates this nonlinear effect on the hazard ratio.  
435           This shows that effect is drastically large and nonlinear when  $\mu_A$  is small, and as  $\mu_A$  gets larger,  
436 the effect flattens out. For example, if  $\mu_A = 1$ , then the hazard ratio corresponding to one-  
437 minute-increase is 0.14, i.e. increasing from a 1-minute to 2-minute average active bout makes  
438 hazard almost 86% (or 7 times) smaller. However, if  $\mu_A = 4$ , a one-minute increase in the  
439 average active bout reduces hazard ratio to 0.82, which translates to roughly 18% decrease. The  
440 observed non-linear effect is consistent with the density plots of average active bout durations

441 shown at the bottom panel of Fig 3. It also shows that participants with average active bout  
442 shorter than 3 minutes are at highest risk of non-surviving.

443 **Fig 3. Effect of the change in  $\mu_A$  on hazard ratio. Top: Change in hazard ratios as a**  
444 **function of 1-minute change in  $\mu_A$ , based on  $\mu_A$  (dashed) and  $\lambda_A$  (solid). Bottom: density of**  
445  **$\mu_A$  for deceased (red) and alive (blue).**

446

## 447 Discussion

448 To our knowledge, this study is the first that demonstrated that patterns of sedentary and  
449 active time accumulation are strongly associated with all-cause mortality independently of total  
450 sedentary and total active time, respectively. The major findings suggest that patterns of active  
451 time accumulation have much stronger significant associations with mortality than patterns of  
452 sedentary time accumulation. Longer average duration of active bouts, a lower probability of  
453 transitioning from active to sedentary behavior, and a higher normalized variability of active  
454 bout durations were strongly negatively associated with all-cause mortality independently of  
455 total active time. Although, the main analysis showed that a longer average duration of sedentary  
456 bouts and a lower probability of transitioning from sedentary to active behavior were positively  
457 associated with all-cause mortality, these associations became non-significant during sensitivity  
458 analysis. A larger proportion of longer sedentary bouts remained positively significantly  
459 associated with all-cause mortality during both sensitivity analyses.

460 The results for durations of active bouts suggest nonlinear associations of average active  
461 bout duration with mortality. The largest nonlinear risk increase was observed in subjects with  
462 average active bout duration less than 3. These results are consistent with previous studies  
463 showing positive health effects of accumulating active time in prolonged active bouts [25,37],

464 but provide more insight in developing further individualized guidelines of physical activity.  
465 The results regarding sedentary bout duration may imply that subjects that accumulate their  
466 sedentary time through prolong sedentary bouts may benefit from breaking those long bouts.  
467 This is consistent with the emerging evidence that breaking up prolong sedentary time can have  
468 multiples positive effects including improvement of cardiovascular and cardiometabolic health  
469 [3,5,6,24,26,53,54].

470 Methodologically, this work compared various approaches to quantify patterns of  
471 sedentary time accumulation through fragmentation of accelerometry measured physical activity.  
472 Active-to-Sedentary and Sedentary-to-Active transition probabilities, co-expressed as reciprocals  
473 of average active bout and average sedentary bout durations, are easily interpretable modifiable  
474 fragmentation metrics with insightful connection to other metrics of fragmentation, and stronger  
475 associations to mortality. Importantly, the use of  $\lambda$  results in a non-linear effect on hazard ratio  
476 that could potentially help with providing more subject-specific guidelines. The parameter of  
477 power law distribution,  $\alpha$ , has been a popular metric in a few recent studies on accumulation  
478 patterns of sedentary time [13,46,53]. Fig 2 demonstrates a close-to-linear relationship between  
479  $\alpha$  and  $\lambda$  with correlation coefficients of 0.94 for sedentary bouts and 0.97 for active bouts.  
480 Nevertheless,  $\alpha_S$  was the only sedentary time fragmentation metric that remained significant  
481 through the sensitivity analyses. This supports recent findings where among several sedentary  
482 fragmentation metrics only  $\alpha_S$  was significantly associated with biomarkers of glucose  
483 metabolism [53].

484 There are a few limitations in the present study. First, the minimum bout length was  
485 defined based on the Actigraph epoch duration of 1 minute. The results may change, if the  
486 sedentary and active bouts are defined in a different way. Second, the threshold of 100 AC used



487 to define sedentary state is a widely accepted for the NHANES data. However, there is an on-  
488 going debate on whether this threshold can be uniformly applied across all age groups and  
489 genders and whether such uniform thresholds induce bias in classifying sedentary behaviors.  
490 Therefore, it is imperative to fragmentation metrics as a function of different threshold values in  
491 future work. Third, the non-wear criteria may overestimate the total amount of sedentary time by  
492 including those have not complied with the protocol and wear the device during sleep time.  
493 Finally, this study is cross-sectional, therefore, all findings are associative, not casual.

494 Fragmentation metrics can provide unique translatable insights into accumulation  
495 patterns for sedentary and active time and lead to the better understanding of associations  
496 between those patterns and health outcomes.

497

498

## 499 **Acknowledgements**

500 **Competing interests:** The authors have declared that no competing interest exist.

501

502

## 503 **References**

- 504 1. Varo JJ, Martínez-González MA, de Irala-Estévez J, Kearney J, Gibney M, Martínez JA.  
505 Distribution and determinants of sedentary lifestyles in the European Union. *Int J*  
506 *Epidemiol.* 2003;32: 138–146. doi:10.1093/ije/dyg116
- 507 2. Buman MP, Winkler EAH, Kurka JM, Hekler EB, Baldwin CM, Owen N, et al.  
508 Reallocating Time to Sleep, Sedentary Behaviors, or Active Behaviors: Associations With  
509 Cardiovascular Disease Risk Biomarkers, NHANES 2005–2006. *Am J Epidemiol.*  
510 2014;179: 323–334. doi:10.1093/aje/kwt292
- 511 3. Owen N, Healy GN, Matthews CE, Dunstan DW. Too much sitting: the population-health  
512 science of sedentary behavior. *Exerc Sport Sci Rev.* 2010;38: 105–113.  
513 doi:10.1097/JES.0b013e3181e373a2
- 514 4. Hamilton MT, Healy GN, Dunstan DW, Zderic TW, Owen N. Too little exercise and too  
515 much sitting: Inactivity physiology and the need for new recommendations on sedentary  
516 behavior. *Curr Cardiovasc Risk Rep.* 2008;2: 292–298. doi:10.1007/s12170-008-0054-8

- 517 5. Dunstan DW, Kingwell BA, Larsen R, Healy GN, Cerin E, Hamilton MT, et al. Breaking  
518 Up Prolonged Sitting Reduces Postprandial Glucose and Insulin Responses. *Diabetes*  
519 *Care*. 2012;35: 976–983. doi:10.2337/dc11-1931
- 520 6. Owen N, Sparling PB, Healy GN, Dunstan DW, Matthews CE. Sedentary Behavior:  
521 Emerging Evidence for a New Health Risk. *Mayo Clin Proc*. 2010;85: 1138–1141.  
522 doi:10.4065/mcp.2010.0444
- 523 7. Matthews CE, Chen KY, Freedson PS, Buchowski MS, Beech BM, Pate RR, et al.  
524 Amount of Time Spent in Sedentary Behaviors in the United States, 2003-2004. *Am J*  
525 *Epidemiol*. 2008;167: 875–881. doi:10.1093/aje/kwm390
- 526 8. Chau JY, Grunseit AC, Chey T, Stamatakis E, Brown WJ, Matthews CE, et al. Daily  
527 Sitting Time and All-Cause Mortality: A Meta-Analysis. Gorlova OY, editor. *PLoS One*.  
528 2013;8: e80000. doi:10.1371/journal.pone.0080000
- 529 9. Matthews CE, George SM, Moore SC, Bowles HR, Blair A, Park Y, et al. Amount of time  
530 spent in sedentary behaviors and cause-specific mortality in US adults. *Am J Clin Nutr*.  
531 2012;95: 437–445. doi:10.3945/ajcn.111.019620
- 532 10. Healy GN, Clark BK, Winkler EAH, Gardiner PA, Brown WJ, Matthews CE.  
533 Measurement of Adults' Sedentary Time in Population-Based Studies. *Am J Prev Med*.  
534 2011;41: 216–227. doi:10.1016/j.amepre.2011.05.005
- 535 11. Davis MG, Fox KR, Hillsdon M, Sharp DJ, Coulson JC, Thompson JL. Objectively  
536 Measured Physical Activity in a Diverse Sample of Older Urban UK Adults. *Med Sci*  
537 *Sport Exerc*. 2011;43: 647–654. doi:10.1249/MSS.0b013e3181f36196
- 538 12. Varma VR, Dey D, Leroux A, Di J, Urbanek J, Xiao L, et al. Re-evaluating the effect of  
539 age on physical activity over the lifespan. *Prev Med (Baltim)*. 2017;101: 102–108.  
540 doi:10.1016/j.ypmed.2017.05.030
- 541 13. Chastin SFM, Granat MH. Methods for objective measure, quantification and analysis of  
542 sedentary behaviour and inactivity. *Gait Posture*. 2010;31: 82–86.  
543 doi:10.1016/j.gaitpost.2009.09.002
- 544 14. Reilly JJ, Penpraze V, Hislop J, Davies G, Grant S, Paton JY. Objective measurement of  
545 physical activity and sedentary behaviour: review with new data. *Arch Dis Child*.  
546 2008;93: 614–619. doi:10.1136/adc.2007.133272
- 547 15. Hamilton MT, Hamilton DG, Zderic TW. Role of Low Energy Expenditure and Sitting in  
548 Obesity, Metabolic Syndrome, Type 2 Diabetes, and Cardiovascular Disease. *Diabetes*.  
549 2007;56: 2655–2667. doi:10.2337/db07-0882
- 550 16. Zderic TW. Physical inactivity amplifies the sensitivity of skeletal muscle to the lipid-  
551 induced downregulation of lipoprotein lipase activity. *J Appl Physiol*. 2006;100: 249–257.  
552 doi:10.1152/jappphysiol.00925.2005
- 553 17. Schmid D, Ricci C, Baumeister SE, Leitzmann MF. Replacing Sedentary Time with  
554 Physical Activity in Relation to Mortality. *Med Sci Sport Exerc*. 2016;48: 1312–1319.  
555 doi:10.1249/MSS.0000000000000913
- 556 18. Rossen J, Buman MP, Johansson U-B, Yngve A, Ainsworth B, Brismar K, et al.  
557 Reallocating bouted sedentary time to non-bouted sedentary time, light activity and  
558 moderate-vigorous physical activity in adults with prediabetes and type 2 diabetes.  
559 Buchowski M, editor. *PLoS One*. 2017;12: e0181053. doi:10.1371/journal.pone.0181053
- 560 19. Fishamn EI, Steeves JA, Zipunnikov V, Koster A, Berrigan D, Harris TA, et al.  
561 Association between Objectively Measured Physical Activity and Mortality in NHANES.  
562 *Med Sci Sport Exerc*. 2016;48: 1303–1311. doi:10.1249/MSS.0000000000000885

- 563 20. Chastin SFM, Palarea-Albaladejo J, Dontje ML, Skelton DA. Combined Effects of Time  
564 Spent in Physical Activity, Sedentary Behaviors and Sleep on Obesity and Cardio-  
565 Metabolic Health Markers: A Novel Compositional Data Analysis Approach. Devaney J,  
566 editor. PLoS One. 2015;10: e0139984. doi:10.1371/journal.pone.0139984
- 567 21. Carson V, Tremblay MS, Chaput J-P, Chastin SFM. Associations between sleep duration,  
568 sedentary time, physical activity, and health indicators among Canadian children and  
569 youth using compositional analyses 1. *Appl Physiol Nutr Metab*. 2016;41: S294–S302.  
570 doi:10.1139/apnm-2016-0026
- 571 22. Tremblay MS, Carson V, Chaput J-P, Connor Gorber S, Dinh T, Duggan M, et al.  
572 Canadian 24-Hour Movement Guidelines for Children and Youth: An Integration of  
573 Physical Activity, Sedentary Behaviour, and Sleep 1. *Appl Physiol Nutr Metab*. 2016;41:  
574 S311–S327. doi:10.1139/apnm-2016-0151
- 575 23. Paraschiv-Ionescu A, Buchser E, Aminian K. Unraveling dynamics of human physical  
576 activity patterns in chronic pain conditions. *Sci Rep*. 2013;3: 1–10. doi:10.1038/srep02019
- 577 24. Healy GN, Eakin EG, LaMontagne AD, Owen N, Winkler EAH, Wiesner G, et al.  
578 Reducing sitting time in office workers: Short-term efficacy of a multicomponent  
579 intervention. *Prev Med (Baltim)*. 2013;57: 43–48. doi:10.1016/j.ypmed.2013.04.004
- 580 25. Healy GN, Dunstan DW, Salmon J, Cerin E, Shaw JE, Zimmet PZ, et al. Breaks in  
581 Sedentary Time: Beneficial associations with metabolic risk. *Diabetes Care*. 2008;31:  
582 661–666. doi:10.2337/dc07-2046
- 583 26. Healy GN, Matthews CE, Dunstan DW, Winkler EAH, Owen N. Sedentary time and  
584 cardio-metabolic biomarkers in US adults: NHANES 2003–06. *Eur Heart J*. 2011;32:  
585 590–597. doi:10.1093/eurheartj/ehq451
- 586 27. Chastin SFM, Ferriolli E, Stephens NA, Fearon KCH, Greig C. Relationship between  
587 sedentary behaviour, physical activity, muscle quality and body composition in healthy  
588 older adults. *Age Ageing*. 2012;41: 111–114. doi:10.1093/ageing/afr075
- 589 28. Lim ASP, Yu L, Costa MD, Buchman AS, Bennett DA, Leurgans SE, et al. Quantification  
590 of the Fragmentation of Rest-Activity Patterns in Elderly Individuals Using a State  
591 Transition Analysis. *Sleep*. 2011;34: 1569–1581. doi:10.5665/sleep.1400
- 592 29. Nakamura T, Kiyono K, Yoshiuchi K, Nakahara R, Struzik ZR, Yamamoto Y. Universal  
593 Scaling Law in Human Behavioral Organization. *Phys Rev Lett*. 2007;99: 138103.  
594 doi:10.1103/PhysRevLett.99.138103
- 595 30. Finkelstein M. Failure Rate Modelling for Reliability and Risk. London: Springer London;  
596 2008. doi:10.1007/978-1-84800-986-8
- 597 31. Johnson C, Paulose-Ram R, Ogden CL. National Health and Nutrition Examination  
598 Survey: Analytic guidelines, 1999–2010. *Vital Heal Stat*. 2013;2: 1–24.
- 599 32. Choi L, N Liu Z, Matthews CE, Buchowski MS. Validation of Accelerometer Wear and  
600 Nonwear Time Classification Algorithm. *Med Sci Sport Exerc*. 2011;43: 357–364.  
601 doi:10.1249/MSS.0b013e3181ed61a3
- 602 33. Troiano RP. Large-Scale Applications of Accelerometers. *Med Sci Sport Exerc*. 2007;39:  
603 1501. doi:10.1097/mss.0b013e318150d42e
- 604 34. Tudor-Locke C, Camhi S, Troiano R. A Catalog of Rules, Variables, and Definitions  
605 Applied to Accelerometer Data in the National Health and Nutrition Examination Survey,  
606 2003–2006. *Prev Chronic Dis*. 2012; doi:10.5888/pcd9.110332
- 607 35. Koster A, Caserotti P, Patel K V., Matthews CE, Berrigan D, Van Domelen DR, et al.  
608 Association of Sedentary Time with Mortality Independent of Moderate to Vigorous

- 609 Physical Activity. Ruiz JR, editor. PLoS One. 2012;7: e37696.  
610 doi:10.1371/journal.pone.0037696
- 611 36. Troiano RP, Berrigan D, Dodd KW, Masse, Louise C, Tilert T, McDowell M. Physical  
612 Activity in the United States Measured by Accelerometer. *Med Sci Sport Exerc.* 2008;40:  
613 181–188. doi:10.1249/mss.0b013e31815a51b3
- 614 37. Lynch BM, Dunstan DW, Healy GN, Winkler E, Eakin E, Owen N. Objectively measured  
615 physical activity and sedentary time of breast cancer survivors, and associations with  
616 adiposity: findings from NHANES (2003–2006). *Cancer Causes Control.* 2010;21: 283–  
617 288. doi:10.1007/s10552-009-9460-6
- 618 38. Gastwirth JL. The Estimation of the Lorenz Curve and Gini Index. *Rev Econ Stat.*  
619 1972;54: 306–316. doi:10.2307/1937992
- 620 39. Lim ASP, Yu L, Costa MD, Leurgans SE, Buchman AS, Bennett DA, et al. Increased  
621 Fragmentation of Rest-Activity Patterns Is Associated With a Characteristic Pattern of  
622 Cognitive Impairment in Older Individuals. *Sleep.* 2012;35: 633–640.  
623 doi:10.5665/sleep.1820
- 624 40. Lim ASP, Kowgier M, Yu L, Buchman AS, Bennett DA. Sleep Fragmentation and the  
625 Risk of Incident Alzheimer’s Disease and Cognitive Decline in Older Persons. *Sleep.*  
626 2013;36: 1027–1032. doi:10.5665/sleep.2802
- 627 41. Lim ASP, Yu L, Kowgier M, Schneider JA, Buchman AS, Bennett DA. Modification of  
628 the Relationship of the Apolipoprotein E  $\epsilon$ 4 Allele to the Risk of Alzheimer Disease and  
629 Neurofibrillary Tangle Density by Sleep. *JAMA Neurol.* 2013;70: 1544.  
630 doi:10.1001/jamaneurol.2013.4215
- 631 42. Lee ET, Wang JW. *Statistical Methods for Survival Data Analysis.* volume 476. John  
632 Wiley & Sons, Inc.; 2003.
- 633 43. Miller R. *Survival Analysis.* Vol 66. John Wiley & Sons, Inc.; 2011.
- 634 44. Clauset A, Shalizi CR, Newman MEJ. Power-Law Distributions in Empirical Data. *SIAM*  
635 *Rev.* 2009;51: 661–703. doi:10.1137/070710111
- 636 45. Gillespie CS. Fitting Heavy Tailed Distributions: The powerLaw Package. *J Stat Softw.*  
637 2015;64. doi:10.18637/jss.v064.i02
- 638 46. Chastin SFM, Baker K, Jones D, Burn D, Granat MH, Rochester L. The pattern of  
639 habitual sedentary behavior is different in advanced Parkinson’s disease. *Mov Disord.*  
640 2010;25: 2114–2120. doi:10.1002/mds.23146
- 641 47. Binder DA. Fitting Cox’s Proportional Hazards Models from Survey Data. *Biometrika.*  
642 1992;79: 139–147. doi:10.2307/2337154
- 643 48. Lin D. On fitting Cox’s proportional hazards models to survey data. *Biometrika.* 2000;87:  
644 37–47. doi:10.1093/biomet/87.1.37
- 645 49. Tsiatis AA. A Large Sample Study of Cox’s Regression Model. *Ann Stat.* 1981;9: 93–  
646 108. doi:10.1214/aos/1176345335
- 647 50. Biswas A, Oh PI, Faulkner GE, Bajaj RR, Silver MA, Mitchell MS, et al. Sedentary Time  
648 and Its Association With Risk for Disease Incidence, Mortality, and Hospitalization in  
649 Adults. *Ann Intern Med.* 2015;162: 123–132. doi:10.7326/M14-1651
- 650 51. Wijndaele K, Brage S, Besson H, Khaw K-T, Sharp SJ, Luben R, et al. Television viewing  
651 time independently predicts all-cause and cardiovascular mortality: the EPIC Norfolk  
652 Study. *Int J Epidemiol.* 2011;40: 150–159. doi:10.1093/ije/dyq105
- 653 52. Urbanek JK, Spira A, Di J, Leroux A, Crainiceanu C, Zipunnikov V. Epidemiology of  
654 Objectively Measured Bedtime and Chronotype in the US adolescents and adults:

- 655 NHANES 2003-2006. 2017; Available: <http://arxiv.org/abs/1706.05416>  
656 53. Bellettiere J, Winkler EAH, Chastin SFM, Kerr J, Owen N, Dunstan DW, et al.  
657 Associations of sitting accumulation patterns with cardio-metabolic risk biomarkers in  
658 Australian adults. Hu C, editor. PLoS One. 2017;12: e0180119.  
659 doi:10.1371/journal.pone.0180119  
660 54. Chastin SFM, Egerton T, Leask C, Stamatakis E. Meta-analysis of the relationship  
661 between breaks in sedentary behavior and cardiometabolic health. Obesity. 2015;23:  
662 1800–1810. doi:10.1002/oby.21180

663  
664  
665

## 666 **Supporting Information**

667 **S1 Table. Results of the baseline models adjusted for all covariates and comorbidities**  
668 **described in Measures and adjusted for the total sedentary time (Model 1) or the total**  
669 **active time (Model 2).**

670 **S2 Table. Results of Cox PH models in original scale without standardization.**

671 **S1 Text. Heuristic Proof that  $\lambda$  is equivalent to the between states transition probability.**

672 **S2 Text. Expressing nonparametric metrics using the empirical CDF.**

673

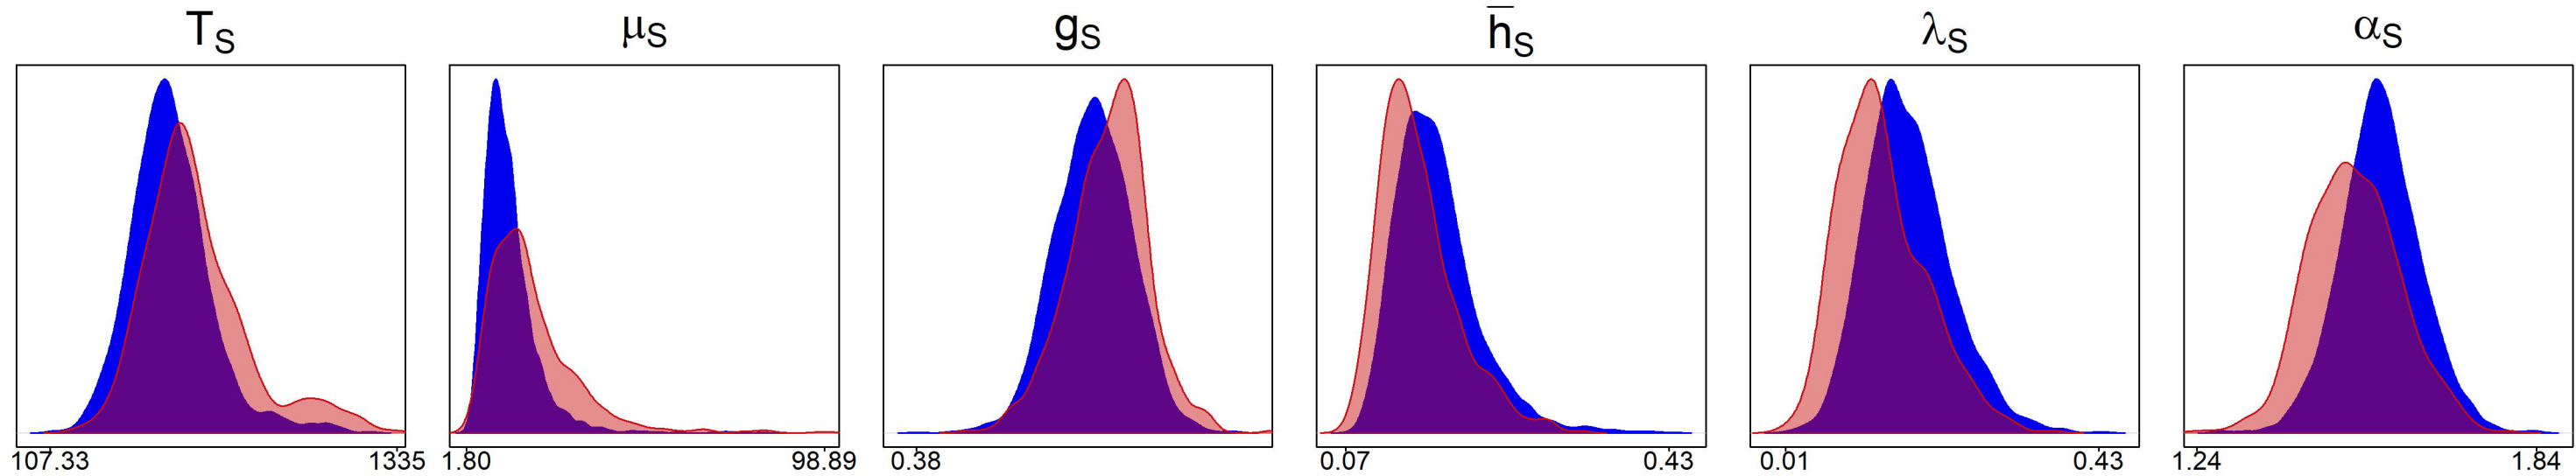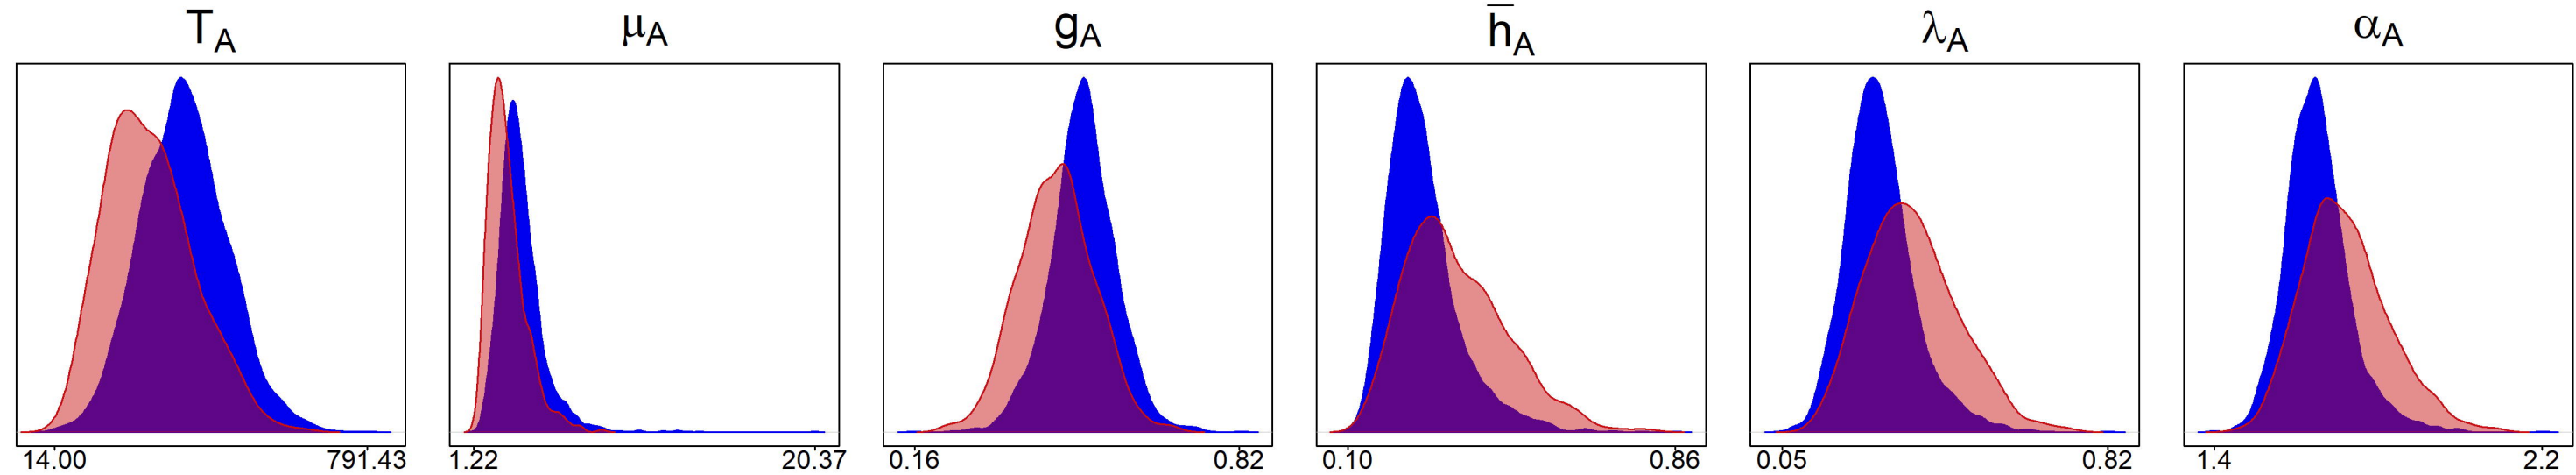

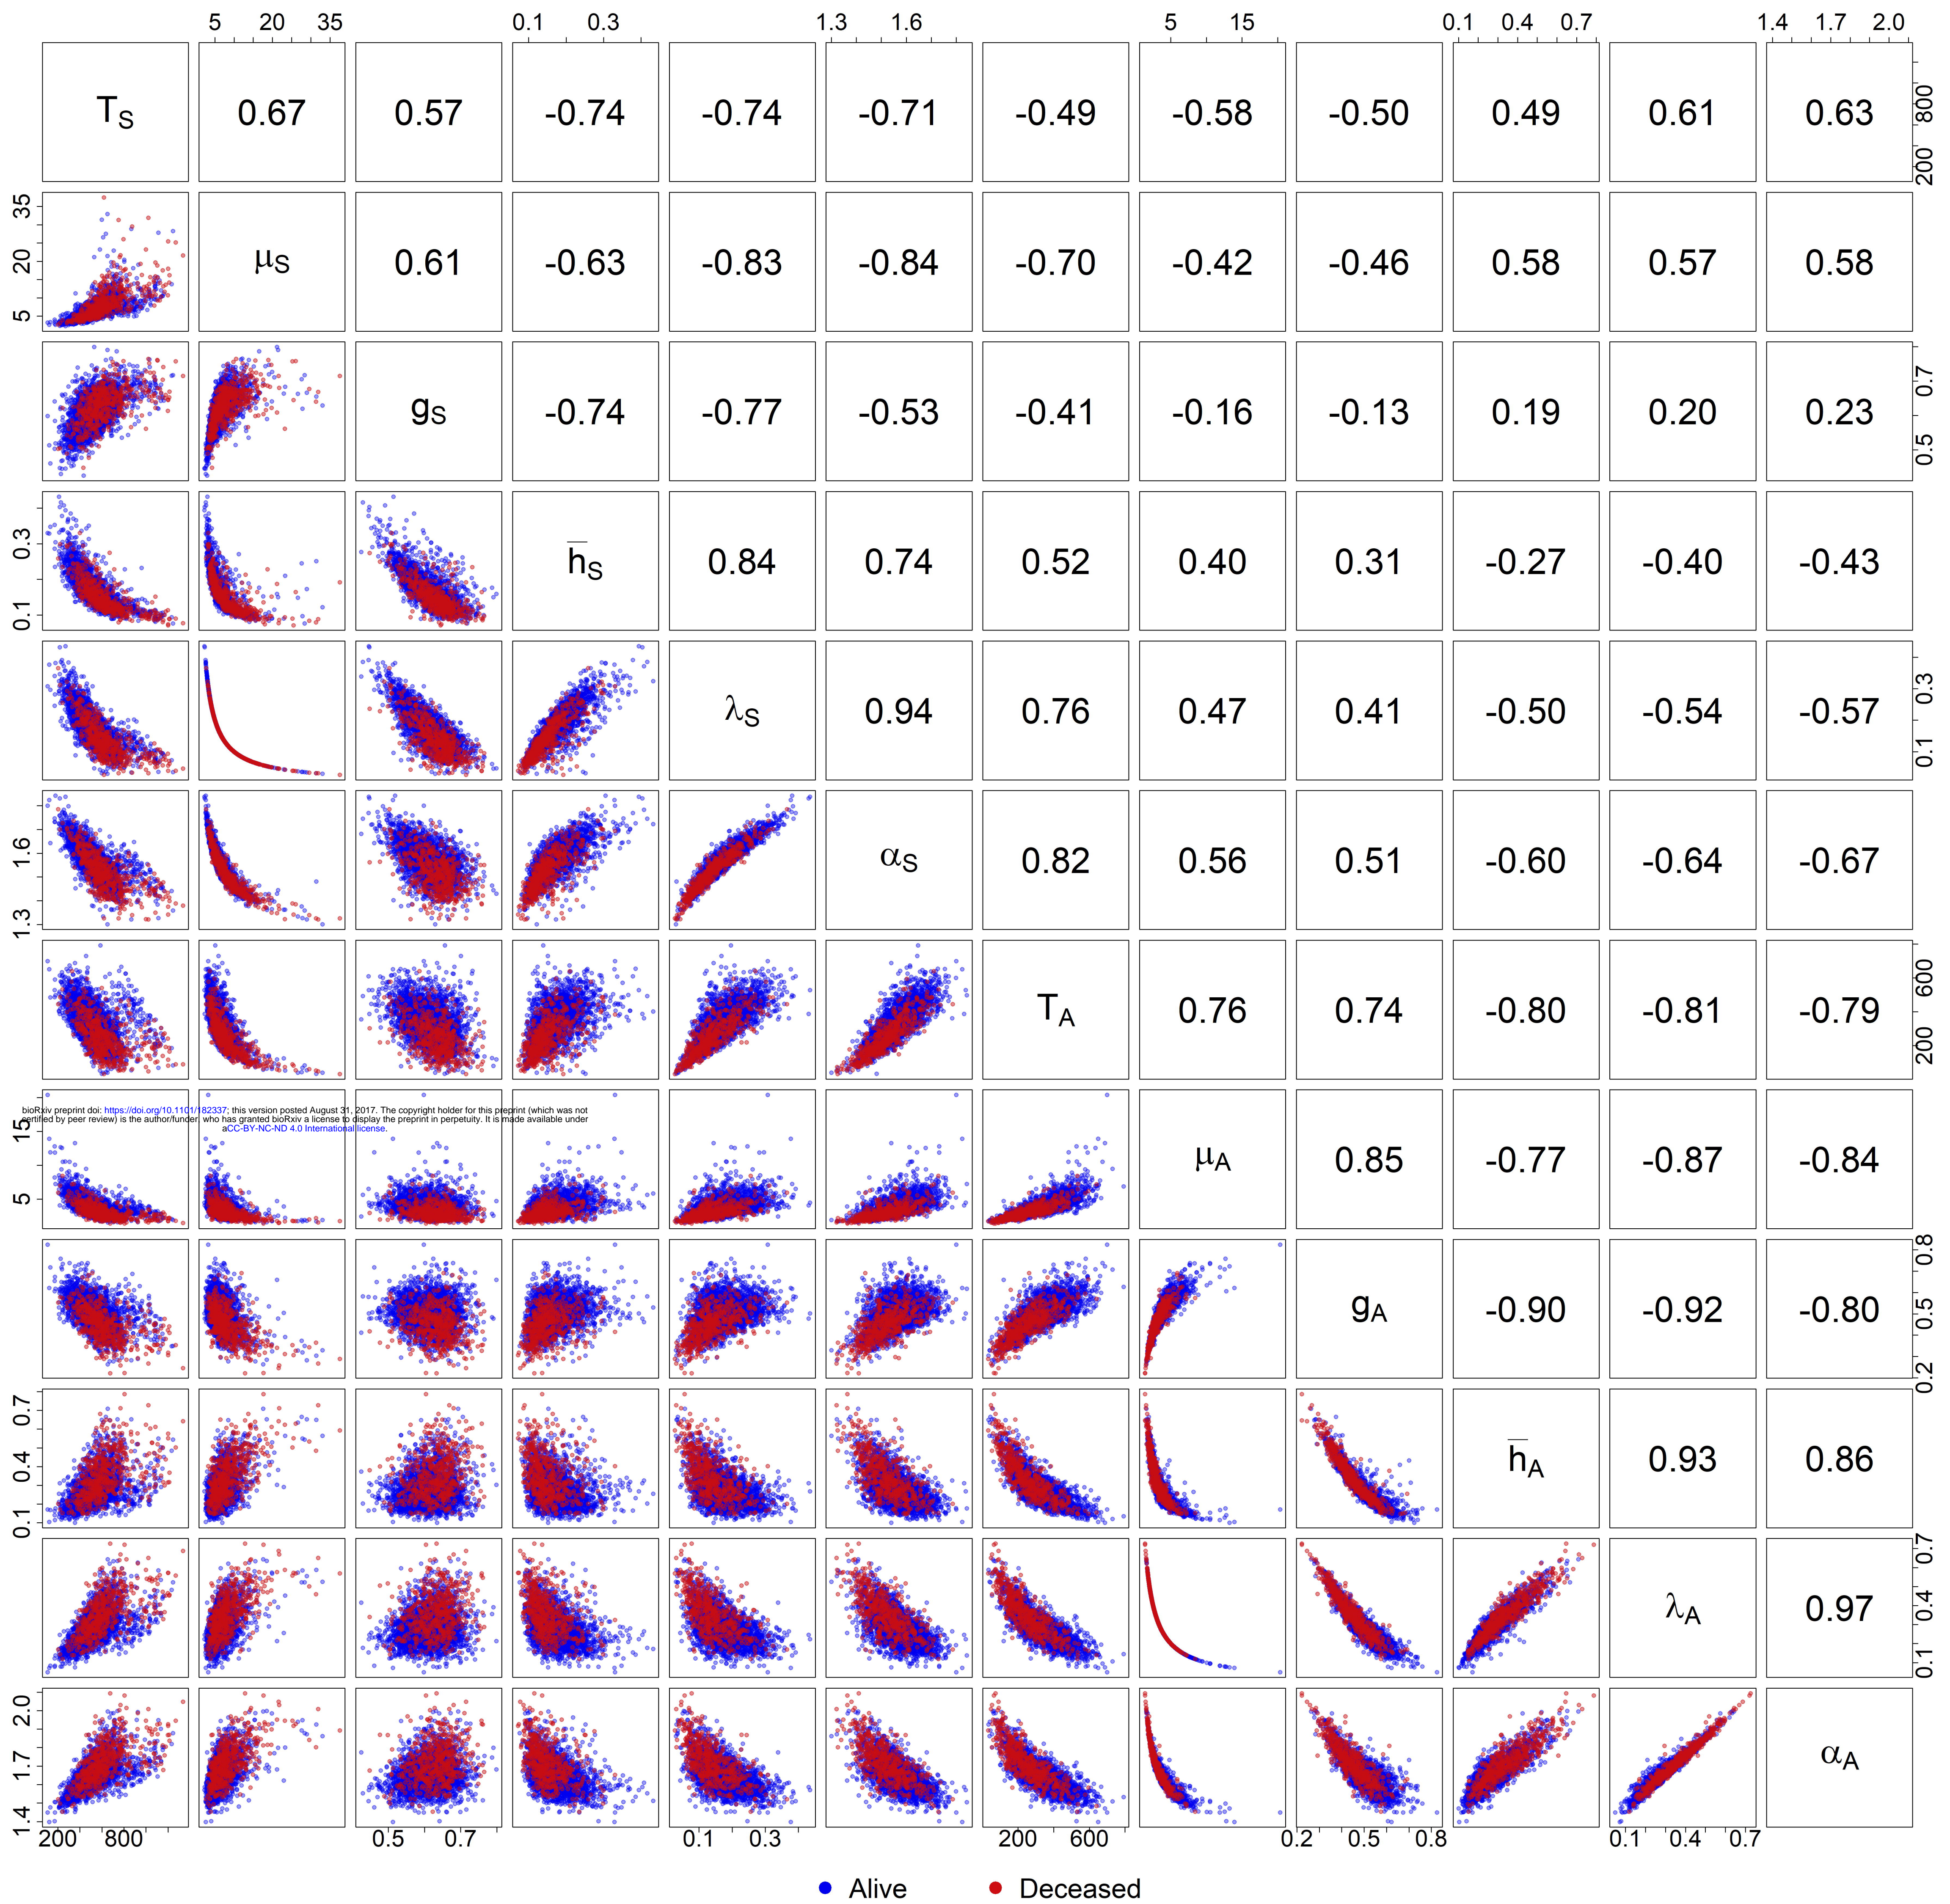

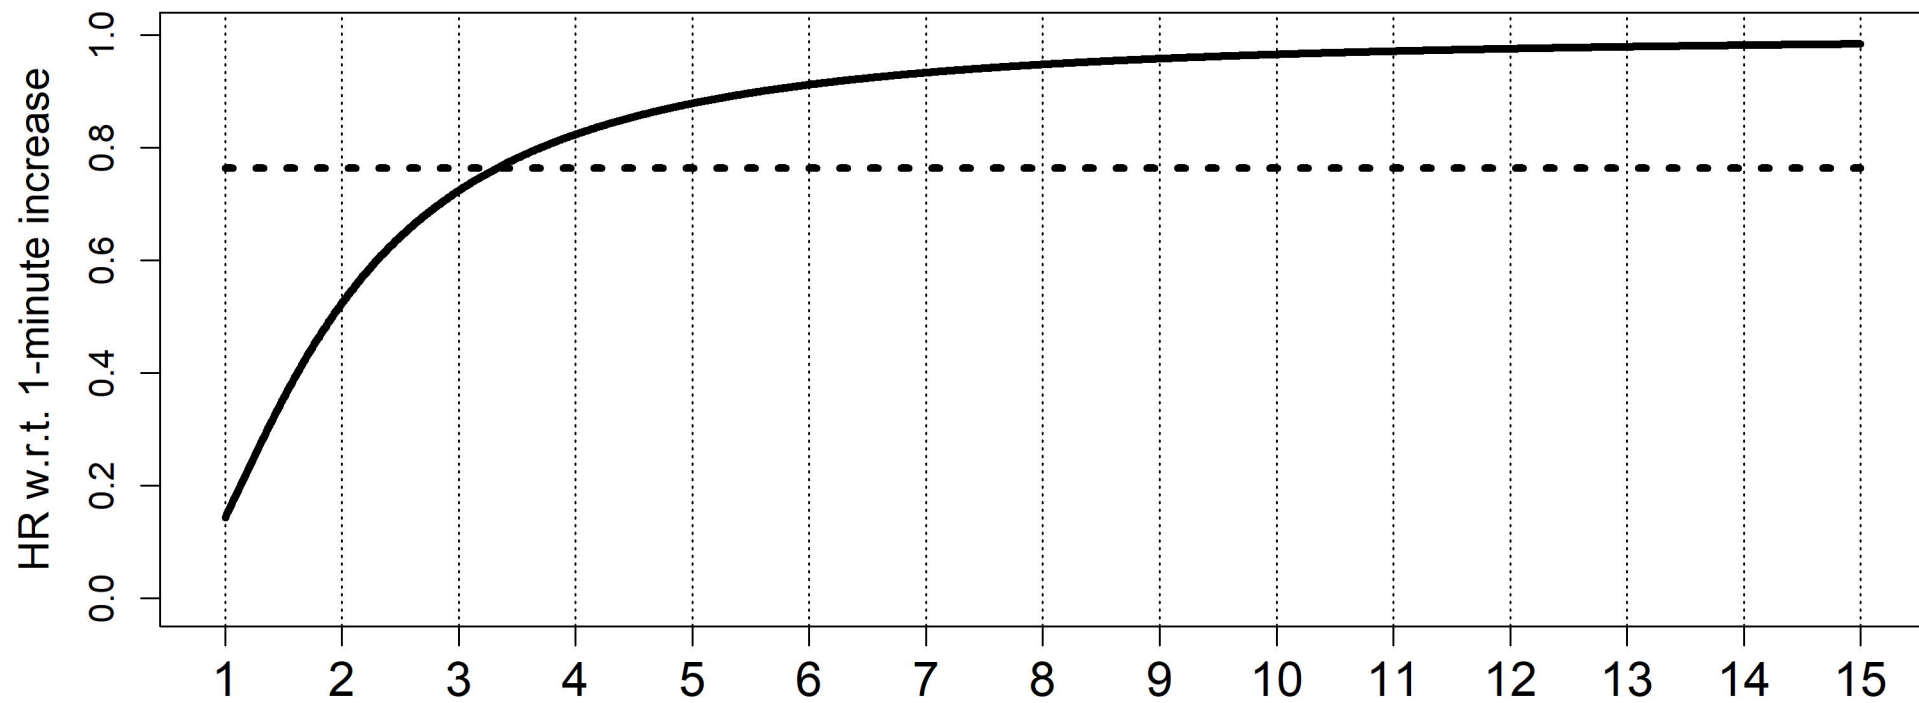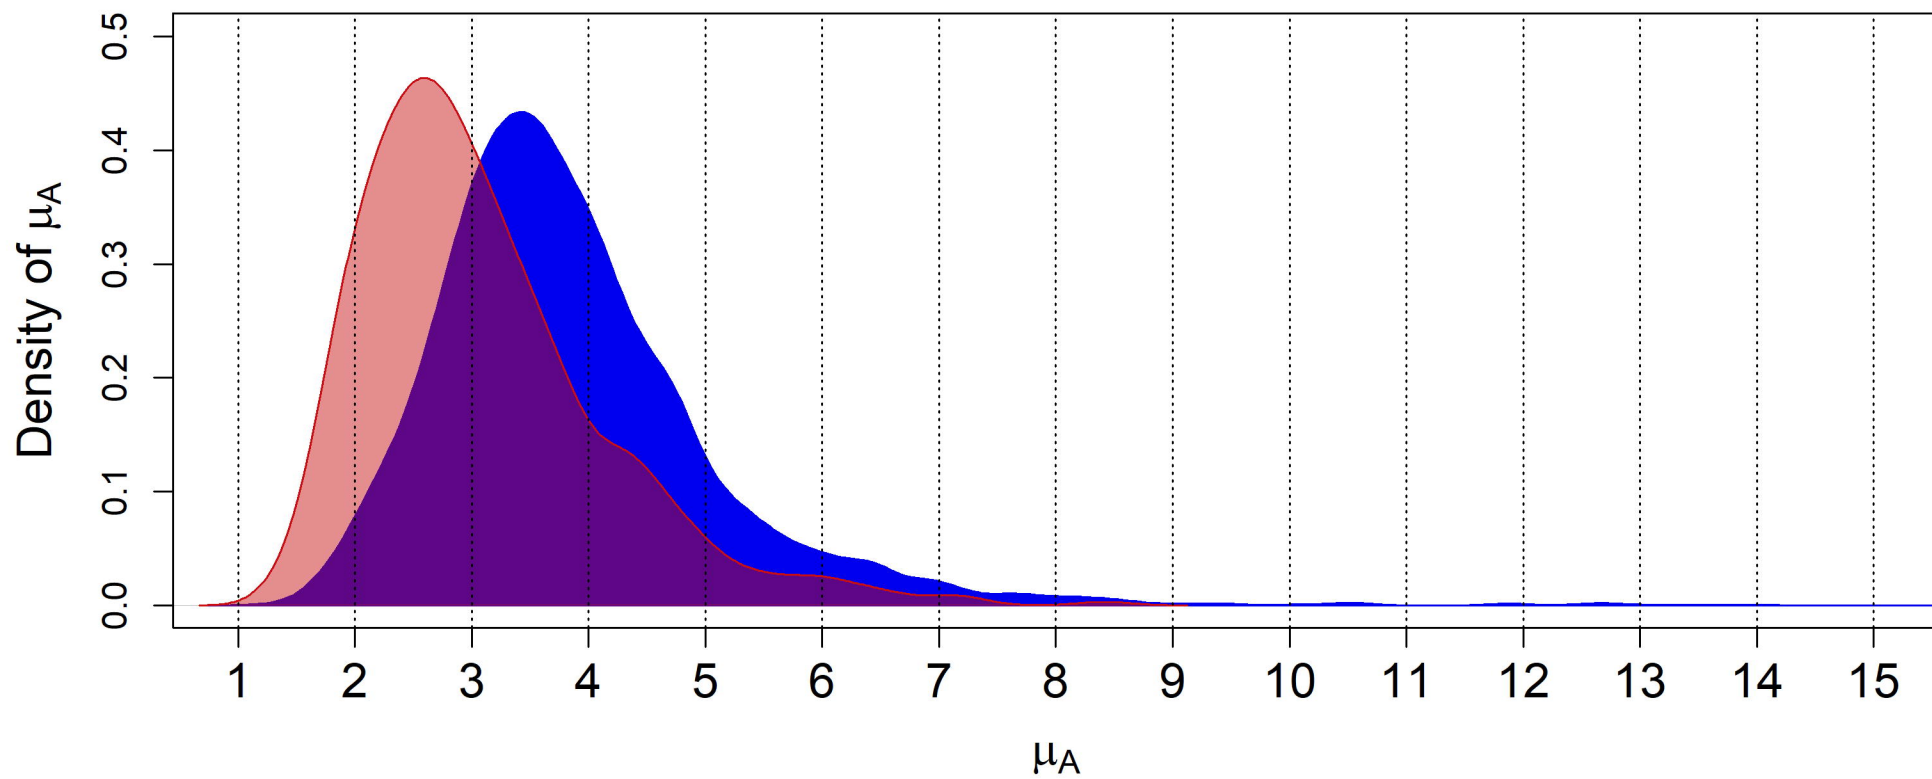

Source: http://biorxiv.org/content/10.1101/182337v1.full.pdf
